# Supplementary material for: Random sampling causes the low reproducibility of rare eukaryotic OTUs in Illumina COI metabarcoding
Source: PeerJ. 2017 Mar 22;5:e3006. doi: 10.7717/peerj.3006 (PMC5364921; doi:10.7717/peerj.3006)
Supplement: Table S2 [file peerj-05-3006-s002.xlsx]

## Sheet: Raw
Rep Seq	OTU #	Origin	Identification	Kingdom	Phylum	Class	Order	Family	Genus Species	Mock_P1_run1	Mock_P1_run2	Mock_P2_run1	Mock_P2_run2	Mock_P3_run1	Mock_P3_run2	Mock_P4_run1	Mock_P4_run2	Mock_P5_run1	Mock_P5_run2	Mock_P6_run1	Mock_P6_run2	Mock_P7_run1	Mock_P7_run2
M03292_11_000000000-AEF91_1_1101_12670_1455	1	Target	Target_Florida_Mock	Metazoa	Arthropoda	Malacostraca	Mysida	Mysidae		62	81	107	118	48	37	15	25	24	20	315	282	28	24
M03292_11_000000000-AEF91_1_1101_18289_8289	3	Target	Target_Florida_Mock	Metazoa	Arthropoda	Malacostraca	Decapoda	Alpheidae	Synalpheus hemphilli	853	833	1000	894	670	629	494	531	879	789	753	721	823	765
M03292_11_000000000-AEF91_1_1101_23521_10413	4	Target	Target_Florida_Mock	Metazoa	Arthropoda	Malacostraca	Decapoda	Alpheidae	Alpheus	37	29	30	20	16	8	16	16	9	13	32	40	29	18
M03292_11_000000000-AEF91_1_1101_4116_12208	5	Non-target	NCBI/BOLD	Metazoa	Echinodermata	Ophiuroidea	Ophiurida	Amphiuridae	Ophiothrix	0	1	2	0	0	1	1	0	1	0	0	0	2	1
M03292_11_000000000-AEF91_1_1101_5887_11500	6	Non-target	NCBI/BOLD	Metazoa	Bryozoa	Gymnolaemata	Cheilostomatida	Bugulidae	Bugula neritina	0	0	5	1	0	3	0	2	3	8	0	1	6	1
M03292_11_000000000-AEF91_1_1101_6063_5428	7	Non-target	NCBI/BOLD	Metazoa	Cnidaria	Hydrozoa	Leptothecata	Campanulariidae	Campanularia hincksii	5	3	4	1	7	7	2	4	5	6	5	6	3	5
M03292_11_000000000-AEF91_1_1101_9255_4382	8	Target	Target_Florida_Mock	Metazoa	Arthropoda	Malacostraca	Decapoda	Panopeidae	Dyspanopeus sayi	2432	2330	1879	1862	1425	1275	1487	1326	2191	2104	1896	1854	2173	2003
M03292_11_000000000-AEF91_1_1102_16413_15599	9	Non-target	NCBI/BOLD	Protist	Ochrophyta	Phaeophyceae				2	2	4	1	1	5	1	1	3	0	1	2	6	6
M03292_11_000000000-AEF91_1_1102_16859_23407	10	Target	Target_Florida_Mock	Metazoa	Arthropoda	Malacostraca	Decapoda	Alpheidae	Alpheus	1422	1316	19	13	737	651	781	662	1234	1202	993	925	1094	1071
M03292_11_000000000-AEF91_1_1102_9057_11521	11	Target	Target_Florida_Mock	Metazoa	Arthropoda	Malacostraca	Isopoda	Sphaeromatidae	Cilicaea	4315	4030	4219	4064	2524	2260	2741	2457	4047	3924	2934	2773	3552	3283
M03292_11_000000000-AEF91_1_1103_12234_23549	12	Non-target	NCBI/BOLD	Metazoa	Chordata	Ascidiacea	Stolidobranchia	Styelidae	Botrylloides nigrum	0	0	1	0	0	2	0	0	1	0	0	0	1	0
M03292_11_000000000-AEF91_1_1103_12711_15038	13	Non-target	SAP	Metazoa	Chordata	Actinopterygii				2	0	0	1	1	1	1	0	3	3	0	1	0	0
M03292_11_000000000-AEF91_1_1103_13952_8066	14	Non-target	Unidentified	Unknown	Unknown					0	1	0	0	0	0	0	0	0	0	1	0	0	0
M03292_11_000000000-AEF91_1_1103_15033_14967	15	Non-target	NCBI/BOLD	Metazoa	Arthropoda	Maxillopoda	Sessilia	Balanidae	Amphibalanus improvisus	0	0	0	0	0	1	0	0	0	0	0	0	2	0
M03292_11_000000000-AEF91_1_1105_24142_3891	16	Target	Target_Florida_Mock	Metazoa	Arthropoda	Malacostraca	Decapoda	Portunidae	Charybdis hellerii	876	822	755	752	1115	1093	611	560	1331	1267	679	750	874	793
M03292_11_000000000-AEF91_1_1105_24975_18262	17	Non-target	NCBI/BOLD	Metazoa	Arthropoda	Malacostraca	Amphipoda			0	0	0	0	0	0	0	0	1	0	0	0	1	0
M03292_11_000000000-AEF91_1_1105_26629_18222	18	Non-target	NCBI/BOLD	Metazoa	Cnidaria	Hydrozoa	Leptothecata	Campanulariidae	Obelia bidentata	0	0	3	1	0	4	1	1	4	3	0	2	3	0
M03292_11_000000000-AEF91_1_1105_28013_12477	19	Non-target	Unidentified	Unknown						197	197	218	188	216	180	104	94	166	137	100	71	161	151
M03292_11_000000000-AEF91_1_1105_5073_21432	20	Non-target	NCBI/BOLD	Metazoa	Cnidaria	Hydrozoa	Anthoathecata	Bougainvilliidae	Bougainvillia	0	0	0	0	2	0	1	0	0	0	0	0	2	1
M03292_11_000000000-AEF91_1_1106_10813_3135	21	Target	Target_Florida_Mock	Metazoa	Annelida	Polychaeta				2276	2211	1721	1735	2071	1846	1462	1404	2786	2637	2014	1892	2309	2230
M03292_11_000000000-AEF91_1_1106_16188_2403	22	Non-target	SAP	Metazoa	Porifera	Demospongiae	Haplosclerida			1	2	0	0	1	0	0	0	0	0	1	0	0	0
M03292_11_000000000-AEF91_1_1107_24642_4580	23	Target	Target_Florida_Mock	Metazoa	Mollusca	Gastropoda				179	189	294	288	253	240	94	119	255	237	164	152	175	171
M03292_11_000000000-AEF91_1_1107_25801_4286	24	Non-target	SAP	Metazoa	Arthropoda	Malacostraca	Amphipoda			0	1	0	0	0	0	0	0	0	0	1	4	1	0
M03292_11_000000000-AEF91_1_1107_3771_10297	25	Non-target	NCBI/BOLD	Metazoa	Porifera	Demospongiae	Poecilosclerida	Microcionidae	Clathria	0	1	0	0	0	0	0	1	0	0	1	0	1	0
M03292_11_000000000-AEF91_1_1108_12454_16036	26	Target	Target_Florida_Mock	Metazoa	Arthropoda	Malacostraca	Decapoda	Palaemonidae		15	11	49	50	6	6	8	9	17	10	11	11	17	16
M03292_11_000000000-AEF91_1_1108_26690_9950	27	Non-target	Unidentified	Unknown	Unknown					0	0	1	0	0	0	1	0	0	0	0	0	0	0
M03292_11_000000000-AEF91_1_1110_7824_4847	29	Non-target	SAP	Metazoa	Arthropoda	Malacostraca	Isopoda			0	0	1	0	0	0	2	0	1	2	0	0	0	0
M03292_11_000000000-AEF91_1_1112_21391_23449	30	Target	Target_Florida_Mock	Metazoa	Plathyelminthes					229	255	221	213	184	200	134	167	364	344	203	197	252	258
M03292_11_000000000-AEF91_1_1113_15372_20267	31	Non-target	Unidentified	Unknown	Unknown					0	0	0	0	0	0	0	0	0	0	3	0	0	0
M03292_11_000000000-AEF91_1_1114_27829_12217	32	Non-target	Unidentified	Unknown	Unknown					0	0	0	0	0	0	0	0	0	0	2	0	0	0
M03292_11_000000000-AEF91_1_1117_12858_15782	33	Target	Target_Florida_Mock	Metazoa	Arthropoda	Malacostraca	Decapoda	Hippolytidae		3010	3011	2730	2582	2896	2587	2206	2093	4044	3697	2734	2564	3112	3038
M03292_11_000000000-AEF91_1_1117_13080_9359	34	Target	Target_Florida_Mock	Metazoa	Annelida	Polychaeta				2975	2777	3501	3337	1347	1275	1947	1953	3148	2918	2185	2014	2994	2927
M03292_11_000000000-AEF91_1_1117_19980_14405	35	Non-target	NCBI/BOLD	Metazoa	Porifera	Homoscleromorpha	Homosclerophorida	Plakinidae	Oscarella	0	0	1	0	0	1	0	0	0	0	0	2	0	0
M03292_11_000000000-AEF91_1_1117_23296_9130	36	Non-target	NCBI/BOLD	Metazoa	Arthropoda	Malacostraca	Amphipoda	Corophiidae	Monocorophium acherusicum	0	0	0	0	0	1	0	0	0	0	0	0	2	0
M03292_11_000000000-AEF91_1_1118_20182_21451	37	Non-target	SAP	Metazoa	Bryozoa					0	0	0	0	0	0	1	0	0	2	0	0	0	1
M03292_11_000000000-AEF91_1_2101_12471_21164	38	Non-target	Unidentified	Unknown	Unknown					0	0	2	0	0	0	0	0	0	0	0	0	0	0
M03292_11_000000000-AEF91_1_2101_20134_18531	39	Non-target	SAP	Metazoa	Arthropoda	Malacostraca	Decapoda			2	5	3	1	2	0	2	4	3	6	5	5	3	0
M03292_11_000000000-AEF91_1_2101_9838_10743	40	Non-target	SAP	Metazoa	Arthropoda	Malacostraca	Tanaidacea			0	0	0	0	0	0	0	0	0	0	0	0	1	1
M03292_11_000000000-AEF91_1_2102_25589_16986	41	Non-target	SAP	Protist	Rhodophyta	Florideophyceae	Gigartinales			2	0	0	0	0	0	0	0	1	0	0	0	0	0
M03292_11_000000000-AEF91_1_2103_12918_13756	42	Target	Target_Florida_Mock	Metazoa	Arthropoda	Malacostraca	Decapoda	Alpheidae	Alpheus	3634	3546	2179	1977	1901	1776	2406	2178	3823	3498	3344	3138	3464	3307
M03292_11_000000000-AEF91_1_2103_13836_7396	43	Non-target	SAP	Protist	Rhodophyta	Florideophyceae	Ceramiales			0	0	2	0	0	0	0	0	0	0	0	0	0	0
M03292_11_000000000-AEF91_1_2103_6948_7628	44	Non-target	SAP	Metazoa	Arthropoda	Maxillopoda	Siphonostomatoida			0	0	0	0	0	1	0	0	1	0	0	0	0	0
M03292_11_000000000-AEF91_1_2104_18579_9241	45	Non-target	NCBI/BOLD	Protist	Rhodophyta	Florideophyceae	Gracilariales	Gracilariaceae	Gracilaria vermiculophylla	0	0	0	0	0	0	1	0	0	4	0	0	0	0
M03292_11_000000000-AEF91_1_2105_19454_7281	46	Non-target	SAP	Protist	Bacillariophyta	Coscinodiscophyceae	Thalassiosirales			1	1	0	0	1	0	1	1	0	0	0	2	0	0
M03292_11_000000000-AEF91_1_2106_5209_15105	48	Target	Target_Florida_Mock	Metazoa	Arthropoda	Malacostraca	Decapoda	Porcellanidae	Petrolisthes armatus	1137	966	872	839	938	855	731	709	1422	1236	956	855	1092	1010
M03292_11_000000000-AEF91_1_2107_20260_24607	49	Non-target	SAP	Metazoa	Annelida	Polychaeta	Phyllodocida			1	0	0	0	0	0	1	0	0	0	0	0	0	0
M03292_11_000000000-AEF91_1_2107_9419_20925	50	Target	Target_Florida_Mock	Metazoa	Platyhelminthes					323	335	375	356	181	195	221	199	350	340	246	232	264	224
M03292_11_000000000-AEF91_1_2108_22405_13091	51	Non-target	Unidentified	Unknown	Unknown					2	0	0	0	0	0	0	0	0	0	0	0	0	0
M03292_11_000000000-AEF91_1_2111_19459_16666	53	Target	Target_Florida_Mock	Metazoa	Arthropoda	Malacostraca	Decapoda	Alpheidae		79	73	23	26	27	34	74	46	103	92	78	71	122	97
M03292_11_000000000-AEF91_1_2112_17887_14661	54	Target	Target_Florida_Mock	Metazoa	Echinodermata	Ophiuroidea	Ophiurida	Ophiactidae	Ophiactis savignyi	1075	1001	1499	1398	703	602	859	764	1409	1340	901	879	1167	1217
M03292_11_000000000-AEF91_1_2113_7747_12433	55	Target	Target_Florida_Mock	Metazoa	Plathyelminthes					7	12	61	54	12	8	3	1	4	8	3	10	2	5
M03292_11_000000000-AEF91_1_2115_14091_13049	56	Target	Target_Florida_Mock	Metazoa	Annelida	Polychaeta	Phyllodocida	Polynoidae	Harmothoe longidentis	1014	952	794	805	1106	994	742	684	1342	1227	1214	1164	1121	1076
M03292_11_000000000-AEF91_1_2116_12896_3978	57	Non-target	Unidentified	Unknown	Unknown					1	1	0	0	0	0	0	0	0	0	0	0	0	0
M03292_11_000000000-AEF91_1_2116_5168_13608	58	Target	Target_Florida_Mock	Metazoa	Echinodermata	Ophiuroidea	Ophiurida	Amphiuridae	Amphipholis squamata	1012	970	991	897	797	779	882	764	1445	1384	978	937	1145	1134
M03292_11_000000000-AEF91_1_2118_11088_5516	59	Target	Target_Florida_Mock	Metazoa	Chordata	Actinopteri	Batrachoidiformes	Batrachoididae	Opsanus tau	7608	6977	5864	5358	5633	5038	5016	4347	8360	7747	6672	5837	7163	6755
M03292_11_000000000-AEF91_1_2118_24865_17841	60	Non-target	SAP	Protist	Bacillariophyta	Fragilariophyceae	Fragilariales			0	1	1	0	0	1	0	1	0	0	0	0	1	0
M03292_11_000000000-AEF91_1_2118_5444_13739	61	Non-target	SAP	Metazoa	Chordata	Ascidiacea	Enterogona			1	0	0	0	0	0	1	0	0	0	0	0	0	0
M03292_11_000000000-AEF91_1_2119_4067_9784	62	Non-target	NCBI/BOLD	Metazoa	Annelida	Polychaeta	Sabellida	Sabellidae	Branchiomma bardi	0	1	0	0	0	0	1	0	0	1	0	3	1	1
M03292_13_000000000-AF69F_1_1102_17557_24000	63	Non-target	Unidentified	Unknown	Unknown					0	0	0	0	0	1	0	0	0	0	0	0	1	0
M03292_13_000000000-AF69F_1_1103_19406_13266	64	Non-target	SAP	Metazoa	Arthropoda	Malacostraca	Amphipoda			0	0	1	0	0	0	0	0	0	1	0	0	0	0
M03292_13_000000000-AF69F_1_1103_27339_17064	65	Non-target	NCBI/BOLD	Metazoa	Bryozoa	Gymnolaemata	Cheilostomatida	Schizoporellidae	Schizoporella errata	0	0	0	3	0	0	0	0	0	0	0	0	0	0
M03292_13_000000000-AF69F_1_1104_2180_14617	66	Non-target	NCBI/BOLD	Metazoa	Arthropoda	Malacostraca	Amphipoda			1	0	0	0	0	1	0	1	0	0	0	3	2	0
M03292_13_000000000-AF69F_1_1105_13859_11620	67	Non-target	NCBI/BOLD	Metazoa	Porifera	Demospongiae	Haplosclerida	Chalinidae	Haliclona	0	0	0	0	0	0	0	0	0	2	0	0	0	0
M03292_13_000000000-AF69F_1_1105_23381_24001	68	Non-target	NCBI/BOLD	Metazoa	Mollusca	Gastropoda		Calyptraeidae	Crepidula plana	0	0	0	1	0	0	0	0	0	0	0	0	1	0
M03292_13_000000000-AF69F_1_1105_28244_7116	69	Non-target	SAP	Metazoa	Annelida	Polychaeta	Terebellida			0	0	0	0	0	0	0	0	0	0	0	0	0	2
M03292_13_000000000-AF69F_1_1105_3153_17730	70	Non-target	NCBI/BOLD	Metazoa	Porifera	Demospongiae	Dendroceratida			0	1	0	0	0	0	0	0	0	0	0	0	0	1
M03292_13_000000000-AF69F_1_1109_13442_19992	71	Non-target	SAP	Protist	Rhodophyta	Florideophyceae				0	0	0	0	0	0	0	0	0	0	1	0	0	1
M03292_13_000000000-AF69F_1_1110_21907_11358	72	Non-target	NCBI/BOLD	Metazoa	Chordata	Ascidiacea	Stolidobranchia	Styelidae	Symplegma rubra	0	0	0	0	0	0	0	1	1	0	0	2	0	0
M03292_13_000000000-AF69F_1_1110_22977_22893	73	Target	Target_Florida_Mock	Metazoa	Chordata	Actinopteri	Gobiiformes	Gobiidae	Coryphopterus	3063	2904	1607	1440	1495	1415	1573	1380	3118	2839	4361	3881	1946	1850
M03292_13_000000000-AF69F_1_1111_8765_6913	74	Non-target	Unidentified	Unknown	Unknown					0	2	0	0	0	0	0	0	0	0	0	0	0	0
M03292_13_000000000-AF69F_1_1112_11047_14138	75	Target	Target_Florida_Mock	Metazoa	Annelida	Polychaeta	Eunicida	Amphinomidae	Eurythoe complanata	894	903	687	626	729	670	639	585	1269	1198	1111	992	1247	1151
M03292_13_000000000-AF69F_1_1112_14973_1896	76	Non-target	SAP	Metazoa	Porifera	Demospongiae				0	0	0	0	0	0	0	0	0	0	0	2	0	0
M03292_13_000000000-AF69F_1_1112_22482_16344	77	Non-target	NCBI/BOLD	Metazoa	Porifera	Demospongiae	Dendroceratida			0	2	0	0	0	0	0	0	0	1	0	1	0	0
M03292_13_000000000-AF69F_1_1112_4355_12820	78	Non-target	NCBI/BOLD	Metazoa	Chordata	Actinopterygii	Perciformes	Apogonidae	Phaeoptyx pigmentaria	0	8	0	0	0	0	0	0	0	0	0	0	0	0
M03292_13_000000000-AF69F_1_1113_8936_22615	79	Non-target	SAP	Metazoa	Mollusca	Polyplacophora	Neoloricata			0	0	0	0	0	0	0	0	0	0	0	0	0	2
M03292_13_000000000-AF69F_1_1114_11429_8696	80	Target	Target_Florida_Mock	Metazoa	Chordata	Actinopteri	Blenniiformes	Blenniidae	Hypleurochilus geminatus	5115	4845	3686	3455	4399	4195	2636	2462	4711	4508	5150	4815	4169	3974
M03292_13_000000000-AF69F_1_1114_20118_22852	81	Non-target	Unidentified	Unknown	Unknown					0	0	0	0	0	0	0	0	0	0	0	1	0	3
M03292_13_000000000-AF69F_1_1114_5075_7423	82	Non-target	SAP	Protist	Rhodophyta	Florideophyceae	Ceramiales			0	0	0	0	0	0	0	0	0	0	1	1	0	0
M03292_13_000000000-AF69F_1_1115_12129_11609	83	Non-target	SAP	Metazoa	Annelida	Polychaeta	Phyllodocida			1	0	0	0	0	0	0	1	0	0	0	0	0	0
M03292_13_000000000-AF69F_1_1115_18180_19781	84	Non-target	SAP	Metazoa	Arthropoda	Malacostraca	Amphipoda			1	0	0	1	0	0	0	1	0	0	0	0	0	5
M03292_13_000000000-AF69F_1_1115_24237_14472	85	Non-target	Unidentified	Unknown	Unknown					0	0	0	0	0	0	0	0	0	0	0	0	1	1
M03292_13_000000000-AF69F_1_1115_26478_12528	86	Non-target	SAP	Metazoa	Arthropoda					0	0	0	1	0	1	0	0	0	0	0	1	0	0
M03292_13_000000000-AF69F_1_1115_4781_12843	87	Non-target	NCBI/BOLD	Metazoa	Annelida	Polychaeta	Terebellida	Terebellidae	Polycirrus	0	0	0	0	0	0	0	0	0	0	0	1	0	1
M03292_13_000000000-AF69F_1_1116_13250_24218	89	Non-target	Unidentified	Unknown	Unknown					0	0	0	0	0	0	0	0	0	1	1	0	0	1
M03292_13_000000000-AF69F_1_1117_2950_16037	90	Non-target	SAP	Metazoa	Annelida	Polychaeta	Haplotaxida			0	0	0	0	0	0	0	0	0	0	0	0	0	2
M03292_13_000000000-AF69F_1_1117_7423_7009	91	Non-target	SAP	Metazoa	Arthropoda	Malacostraca	Isopoda			0	0	0	0	0	0	0	2	0	0	0	0	0	0
M03292_13_000000000-AF69F_1_1118_22128_19408	92	Target	Target_Florida_Mock	Metazoa	Annelida	Polychaeta	Phyllodocida	Hesionidae		3566	3327	2616	2354	2031	1827	2520	2267	1790	1709	3023	2782	4052	3767
M03292_13_000000000-AF69F_1_1118_23907_15041	93	Non-target	SAP	Protist	Bacillariophyta					0	0	0	0	0	0	0	0	0	0	0	3	0	0
M03292_13_000000000-AF69F_1_2101_15812_5308	96	Target	Target_Florida_Mock	Metazoa	Arthropoda	Malacostraca	Decapoda	Majidae	Microphrys bicornutus	3462	3213	2394	2292	2672	2411	1902	1739	3412	3183	2857	2652	2557	2432
M03292_13_000000000-AF69F_1_2102_6933_9110	97	Non-target	SAP	Metazoa	Nematoda					0	0	1	0	0	3	0	0	1	0	0	0	0	0
M03292_13_000000000-AF69F_1_2103_12129_23432	98	Non-target	SAP	Protist	Rhodophyta	Florideophyceae				0	0	0	3	0	0	0	0	0	0	0	0	0	0
M03292_13_000000000-AF69F_1_2103_18244_18124	99	Non-target	NCBI/BOLD	Metazoa	Arthropoda	Ostracoda				0	0	0	0	0	3	0	0	0	0	0	0	0	0
M03292_13_000000000-AF69F_1_2103_9228_16713	100	Target	Target_Florida_Mock	Metazoa	Arthropoda	Malacostraca	Decapoda	Mithracidae	Mithraculus forceps	1696	1559	1070	1006	898	777	932	833	1430	1299	1434	1351	904	838
M03292_13_000000000-AF69F_1_2103_9557_11447	101	Non-target	SAP	Protist	Rhodophyta	Florideophyceae				0	0	0	0	0	2	0	0	0	0	0	0	0	0
M03292_13_000000000-AF69F_1_2104_17388_19613	102	Non-target	SAP	Metazoa	Arthropoda	Malacostraca	Decapoda			0	0	0	0	0	0	0	0	0	0	0	0	1	1
M03292_13_000000000-AF69F_1_2105_9567_16918	103	Non-target	SAP	Metazoa	Annelida	Polychaeta	Eunicida			0	0	0	0	1	3	0	0	0	0	0	0	0	0
M03292_13_000000000-AF69F_1_2107_13880_13814	104	Non-target	NCBI/BOLD	Metazoa	Arthropoda	Malacostraca	Amphipoda	Corophiidae	Monocorophium insidiosum	0	0	0	0	0	0	0	0	0	0	0	2	0	0
M03292_13_000000000-AF69F_1_2107_9960_19008	105	Non-target	SAP	Metazoa	Bryozoa					0	0	0	1	0	0	0	2	0	0	0	0	0	0
M03292_13_000000000-AF69F_1_2108_11655_4115	106	Non-target	NCBI/BOLD	Metazoa	Bryozoa	Gymnolaemata	Cheilostomatida	Membraniporidae	Biflustra arborescens	0	0	0	0	0	1	0	0	1	1	0	0	0	0
M03292_13_000000000-AF69F_1_2108_6502_18635	107	Non-target	Unidentified	Unknown	Unknown					0	0	0	0	0	0	0	0	0	0	0	3	0	0
M03292_13_000000000-AF69F_1_2108_8701_4404	108	Non-target	NCBI/BOLD	Metazoa	Arthropoda	Malacostraca	Amphipoda			0	0	0	1	0	1	0	0	0	0	0	1	0	0
M03292_13_000000000-AF69F_1_2109_16057_24436	109	Non-target	SAP	Metazoa	Nematoda	Chromadorea	Chromadorida			0	0	0	0	0	0	0	1	0	2	0	0	0	0
M03292_13_000000000-AF69F_1_2109_26335_22237	110	Non-target	NCBI/BOLD	Protist	Rhodophyta	Florideophyceae	Corallinales	Corallinaceae	Corallinac	0	1	0	0	0	0	0	0	1	2	0	0	0	1
M03292_13_000000000-AF69F_1_2110_13101_24605	111	Target	Target_Florida_Mock	Metazoa	Mollusca	Gastropoda	Sacoglossa	Placobranchidae	Elysia subornata	862	864	1159	1044	977	998	556	505	1167	1175	925	861	2820	2827
M03292_13_000000000-AF69F_1_2111_15191_9956	112	Non-target	SAP	Metazoa	Arthropoda	Malacostraca				0	2	0	0	0	0	0	0	0	0	0	0	0	0
M03292_13_000000000-AF69F_1_2112_15316_23369	113	Non-target	NCBI/BOLD	Metazoa	Annelida	Polychaeta	Golfingiida			0	0	0	0	0	0	0	0	0	0	0	2	0	0
M03292_13_000000000-AF69F_1_2112_22899_9660	114	Target	Target_Florida_Mock	Metazoa	Annelida	Polychaeta				8989	8456	7516	7119	8095	7181	6322	5678	10873	10227	9252	8372	8910	8130
M03292_13_000000000-AF69F_1_2113_16475_19354	115	Non-target	SAP	Metazoa	Annelida	Polychaeta				0	0	0	0	0	0	0	0	0	0	0	0	1	1
M03292_13_000000000-AF69F_1_2113_19201_15866	116	Target	Target_Florida_Mock	Metazoa	Echinodermata	Ophiuroidea	Ophiurida			3592	3365	352	369	2421	2187	2894	2579	4622	4357	3446	3194	3996	3783
M03292_13_000000000-AF69F_1_2113_19358_14733	117	Non-target	SAP	Metazoa	Arthropoda	Malacostraca	Decapoda			0	1	0	0	0	0	0	1	0	0	0	0	0	0
M03292_13_000000000-AF69F_1_2114_23015_17230	118	Non-target	SAP	Metazoa	Arthropoda	Pycnogonida	Pantopoda			0	0	0	0	0	0	0	0	0	1	0	1	0	0
M03292_13_000000000-AF69F_1_2114_8907_17620	119	Non-target	NCBI/BOLD	Metazoa	Annelida	Polychaeta	Terebellida	Terebellidae		0	0	1	1	0	1	0	0	0	1	0	0	0	0
M03292_13_000000000-AF69F_1_2115_2658_18024	120	Non-target	SAP	Metazoa	Arthropoda					0	0	0	0	0	0	0	1	0	0	1	0	0	0
M03292_13_000000000-AF69F_1_2117_2452_11081	121	Non-target	SAP	Metazoa	Annelida	Polychaeta				0	1	0	0	0	0	0	1	0	0	0	0	0	0
M03292_13_000000000-AF69F_1_2117_9223_9756	123	Target	Target_Florida_Mock	Metazoa	Arthropoda	Malacostraca	Decapoda	Eriphiidae	Menippe mercenaria	2929	2780	2214	2209	3038	2968	1922	1755	3484	3339	2459	2391	2562	2485
M03292_13_000000000-AF69F_1_2118_23873_15153	124	Non-target	NCBI/BOLD	Protist	Ochrophyta	Phaeophyceae				0	0	0	0	0	0	0	0	0	0	0	2	0	0
M03292_13_000000000-AF69F_1_2118_3570_11279	125	Target	Target_Florida_Mock	Metazoa	Annelida	Polychaeta	Phyllodocida	Polynoidae	Lepidonotus humilis	5151	5148	3455	3359	3899	3697	3515	3203	5890	5638	5112	4769	4986	4822
M03292_13_000000000-AF69F_1_2119_19368_6025	126	Target	Target_Florida_Mock	Metazoa	Arthropoda	Malacostraca	Decapoda	Panopeidae	Panopeus occidentalis	1807	1708	1562	1464	2103	1848	1687	1488	2891	2696	2262	1944	2226	2151
M03292_13_000000000-AF69F_1_2119_21406_3884	127	Non-target	SAP	Metazoa	Arthropoda	Maxillopoda	Harpacticoida			0	0	0	0	0	0	0	0	0	0	0	2	0	0
M03292_13_000000000-AF69F_1_2119_7021_16893	128	Non-target	SAP	Metazoa	Arthropoda	Malacostraca	Amphipoda			0	0	0	0	0	0	0	0	0	1	0	0	1	0

## Sheet: Legend
Column name	Description
Rep Seq	Representative sequences of each OTU picked by CROP
OTU #	OTU number
Origin	Target: OTU that matched the COI sequence of a species included in the mock sample; Non-target: OTU that did not match any target OTU
Identification	Target_Florida_Mock: OTU that matched the COI sequence of a species included in the mock sample; NCBI/BOLD: OTU that did not match a target OTU but had >97% similarity with a reference COI barcode in NCBI or BOLD; SAP: OTU that did not match a target OTU nor a reference COI barcode in NCBI or BOLD but could be confidently assigned to higher a taxonomic level using a Bayesian phylogenetic approach…
Mock_P1_run1	COI amplified from mock sample with indexed primer pair 1 and sequenced in Illumina MiSeq run 1
